# Supplementary material for: Emergence of Intergenogroup Reassortant G9P[4] Strains Following Rotavirus Vaccine Introduction in Ghana
Source: MDPI journal article supplement (doi:10.3390/v15122453), 2023-12-18
Supplement: s1 [file s1]

Table S2. Distribution of human RVA genotype constellations detected from 1976 to 2006 across 27 countries worldwide

## Supplementary 2a. Typical human RVA genotype constellations ( n = 735)

|           |      |                                 |             | Genotype constellation |      |     |     |     |      |      |      |      |      |      |
|-----------|------|---------------------------------|-------------|------------------------|------|-----|-----|-----|------|------|------|------|------|------|
| Genogroup |      | Number of human RVA strains (%) |             | VP7                    | VP4  | VP1 | VP2 | VP3 | NSP1 | NSP2 | NSP3 | NSP4 | NSP5 | NSP6 |
| 1         | Wa   | 614 (83.8%)                     | 483 (65.7%) | G1                     | P[8] | I1  | R1  | C1  | M1   | A1   | N1   | T1   | E1   | H1   |
| 2         |      |                                 | 6 (0.8%)    | G1                     | P[6] | I1  | R1  | C1  | M1   | A1   | N1   | T1   | E1   | H1   |
| 3         |      |                                 | 38 (5.2%)   | G3                     | P[8] | I1  | R1  | C1  | M1   | A1   | N1   | T1   | E1   | H1   |
| 4         |      |                                 | 2 (0.3%)    | G3                     | P[6] | I1  | R1  | C1  | M1   | A1   | N1   | T1   | E1   | H1   |
| 5         |      |                                 | 39 (5.3%)   | G4                     | P[8] | I1  | R1  | C1  | M1   | A1   | N1   | T1   | E1   | H1   |
| 6         |      |                                 | 2 (0.3%)    | G4                     | P[6] | I1  | R1  | C1  | M1   | A1   | N1   | T1   | E1   | H1   |
| 7         |      |                                 | 12 (1.6%)   | G12                    | P[6] | I1  | R1  | C1  | M1   | A1   | N1   | T1   | E1   | H1   |
| 8         |      |                                 | 4 (0.5%)    | G12                    | P[8] | I1  | R1  | C1  | M1   | A1   | N1   | T1   | E1   | H1   |
| 9         |      |                                 | 28 (3.8%)   | G9                     | P[8] | I1  | R1  | C1  | M1   | A1   | N1   | T1   | E1   | H1   |
| 10        | DS-1 | 114 (15.3%)                     | 75 (10%)    | G2                     | P[4] | I2  | R2  | C2  | M2   | A2   | N2   | T2   | E2   | H2   |
| 11        |      |                                 | 4 (0.5%)    | G2                     | P[6] | I2  | R2  | C2  | M2   | A2   | N2   | T2   | E2   | H2   |
| 12        |      |                                 | 20 (2.7%)   | G8                     | P[4] | I2  | R2  | C2  | M2   | A2   | N2   | T2   | E2   | H2   |
| 13        |      |                                 | 15 (2.0%)   | G8                     | P[6] | I2  | R2  | C2  | M2   | A2   | N2   | T2   | E2   | H2   |
| 14        | AU-1 | 7 (1%)                          | 7 (1.0%)    | G3                     | P[9] | I3  | R3  | C3  | M3   | A3   | N3   | T3   | E3   | H3   |
| Total     |      | 735                             |             |                        |      |     |     |     |      |      |      |      |      |      |

## Supplementary 2b. Unusual human RVA genotype constellations ( n = 119)

| 58 distinct<br>genotype<br>constellations | Number<br>of human<br>RVAs | Origin of formation            | Frequency of<br>appearance                                   | Genotype constellation |      |     |     |     |      |      |      |      |      |      |
|-------------------------------------------|----------------------------|--------------------------------|--------------------------------------------------------------|------------------------|------|-----|-----|-----|------|------|------|------|------|------|
|                                           |                            |                                |                                                              | VP7                    | VP4  | VP1 | VP2 | VP3 | NSP1 | NSP2 | NSP3 | NSP4 | NSP5 | NSP6 |
| 1                                         | 1                          | Inter-genogroup<br>reassortant | Sporadic                                                     | G1                     | P[4] | I2  | R2  | C2  | M2   | A2   | N2   | T2   | E2   | H2   |
| 2                                         | 1                          |                                | Sporadic                                                     | G1                     | P[8] | I1  | R1  | C1  | M1   | A1   | N1   | T2   | E1   | H1   |
| 3                                         | 1                          |                                | Sporadic                                                     | G1                     | P[8] | I1  | R1  | C1  | M1   | A2   | N1   | T1   | E1   | H1   |
| 4                                         | 3                          |                                | Sporadic                                                     | G1                     | P[8] | I1  | R1  | C1  | M2   | A1   | N1   | T2   | E1   | H1   |
| 5                                         | 1                          |                                | Sporadic                                                     | G1                     | P[9] | I1  | R1  | C1  | M2   | A1   | N2   | T2   | E1   | H1   |
| 6                                         | 1                          |                                | Sporadic                                                     | G1                     | P[9] | I1  | R1  | C1  | M3   | A1   | N1   | T2   | E1   | H1   |
| 7                                         | 1                          |                                | Sporadic                                                     | G1                     | P[9] | I1  | R3  | C3  | M3   | A1   | N1   | T3   | E3   | H3   |
| 8                                         | 1                          |                                | Sporadic                                                     | G1                     | P[6] | I1  | R1  | C1  | M1   | A1   | N1   | T2   | E1   | H1   |
| 9                                         | 1                          |                                | Sporadic                                                     | G12                    | P[4] | I2  | R2  | C2  | M1   | A2   | N1   | T2   | E2   | H1   |
| 10                                        | 1                          |                                | Sporadic                                                     | G12                    | P[6] | I1  | R1  | C1  | M1   | A1   | N1   | T2   | E1   | H1   |
| 11                                        | 1                          |                                | Sporadic                                                     | G12                    | P[6] | I2  | R2  | C2  | M2   | A2   | N1   | T2   | E6   | H2   |
| 12                                        | 1                          |                                | Sporadic                                                     | G12                    | P[6] | I2  | R2  | C2  | M2   | A2   | N2   | T2   | E1   | H2   |
| 13                                        | 1                          |                                | Sporadic                                                     | G12                    | P[6] | I2  | R2  | C2  | M2   | A2   | N2   | T2   | E6   | H2   |
| 14                                        | 14                         |                                | Repeated circulation<br>over a period of 6 years<br>in Japan | G2                     | P[4] | I2  | R2  | C2  | M2   | A2   | N1   | T2   | E2   | H2   |
| 15                                        | 1                          |                                | Sporadic                                                     | G2                     | P[6] | I2  | R2  | C2  | M2   | A2   | N1   | T2   | E2   | H2   |
| 16                                        | 1                          |                                | Sporadic                                                     | G3                     | P[3] | I1  | R1  | C1  | M1   | A1   | N1   | T1   | E1   | H1   |
| 17                                        | 1                          |                                | Sporadic                                                     | G3                     | P[6] | I2  | R2  | C2  | M2   | A2   | N2   | T2   | E2   | H2   |

[illegible]

**Supplementary 2c. Mixed genotype constellations ( n = 25)**

|       |                      | Genotype constellation |           |       |          |       |       |       |       |       |       |       |
|-------|----------------------|------------------------|-----------|-------|----------|-------|-------|-------|-------|-------|-------|-------|
|       | Number of human RVAs | VP7                    | VP4       | VP1   | VP2      | VP3   | NSP1  | NSP2  | NSP3  | NSP4  | NSP5  | NSP6  |
| 1     | 1                    | G9                     | P[9]      | I3    | R3       | C3    | M3    | A3    | N1    | T1/T3 | E3    | H3    |
| 2     | 1                    | G1                     | P[4],P[8] | I1    | R2       | C2    | M1    | A2    | N1/N2 | T2    | E2    | H2    |
| 3     | 1                    | G1,G10                 | P[8]      | I2    | R2       | C2    | M2    | A1    | N1    | T1    | E2    | H3    |
| 4     | 1                    | G12                    | P[8]      | I2    | R2       | C1,C2 | M1    | A2    | N2    | T2    | E2    | H2    |
| 5     | 4                    | G1,G3                  | P[8]      | I1    | R1       | C1    | M1    | A1    | N1    | T1    | E1    | H1    |
| 6     | 1                    | G2                     | P[4]      | I2    | R2,R1    | C2    | M2    | A2    | N2    | T2    | E2    | H2    |
| 7     | 1                    | G2,G9                  | P[4]      | I2    | R1,R2,R1 | C2    | M2    | A2    | N2    | T2    | E2    | H2    |
| 8     | 1                    | G1,G9                  | P[8]      | I1,I1 | R1       | C1,C1 | M1,M1 | A1,A1 | N1,N1 | T1,T1 | E1,E1 | H1,H1 |
| 9     | 3                    | G2,G9                  | P[4]      | I2    | R2       | C2    | M2    | A2    | N2    | T2    | E2    | H2    |
| 10    | 1                    | G4                     | P[8]      | I1    | R1       | C1    | M1    | A1    | N1    | T1    | E1,E1 | H1    |
| 11    | 1                    | G1,G4                  | P[8]      | I1    | R1       | C1    | M1    | A1    | N1    | T1    | E1    | H1    |
| 12    | 1                    | G1,G4                  | P[4]      | I1/I2 | R1/R2    | C2    | M1    | A1    | N1/N2 | T2    | E2    | H2    |
| 13    | 1                    | G1,G9                  | P[8]      | I1    | R1       | C1    | M1    | A1    | N1    | T1    | E1    | H1    |
| 14    | 1                    | G12                    | P[8],P[8] | I3    | R3       | C3    | M3,M1 | A3    | N1    | T3    | E3    | H6    |
| 15    | 1                    | G9,G4                  | P[8]      | I1,I1 | R1       | C1    | M1,M1 | A1,A1 | N1,N1 | T1,T1 | E1    | H1    |
| 16    | 1                    | G1                     | P[8]      | I1    | R1,R1    | C1    | M1,M1 | A1    | N1    | T1    | E1    | H1    |
| 17    | 1                    | G4/G1                  | P[8]      | I1    | R1       | C1    | M1    | A1    | N1    | T1    | E1    | H1    |
| 18    | 1                    | G1                     | P[8]      | I1    | R1,R1    | C1    | M1    | A1    | N1    | T1,T1 | E1    | H1    |
| 19    | 1                    | G9,G12                 | P[6]      | I1    | R1       | C1    | M1    | A1,A1 | N1    | T1    | E1    | H1    |
| 20    | 1                    | G12                    | P[8]      | I1    | R1       | C1,C1 | M1    | A1    | N1    | T1    | E1    | H1    |
| Total | 25                   |                        |           |       |          |       |       |       |       |       |       |       |
