# Supplementary material for: Emergence of Intergenogroup Reassortant G9P[4] Strains Following Rotavirus Vaccine Introduction in Ghana
Source: MDPI journal article supplement (doi:10.3390/v15122453), 2023-12-18

**Figure S2: Heat map depicting nucleotide similarity for NSP4 sequences among Ghanaian G9P[4] and others G9P[4] strains.**

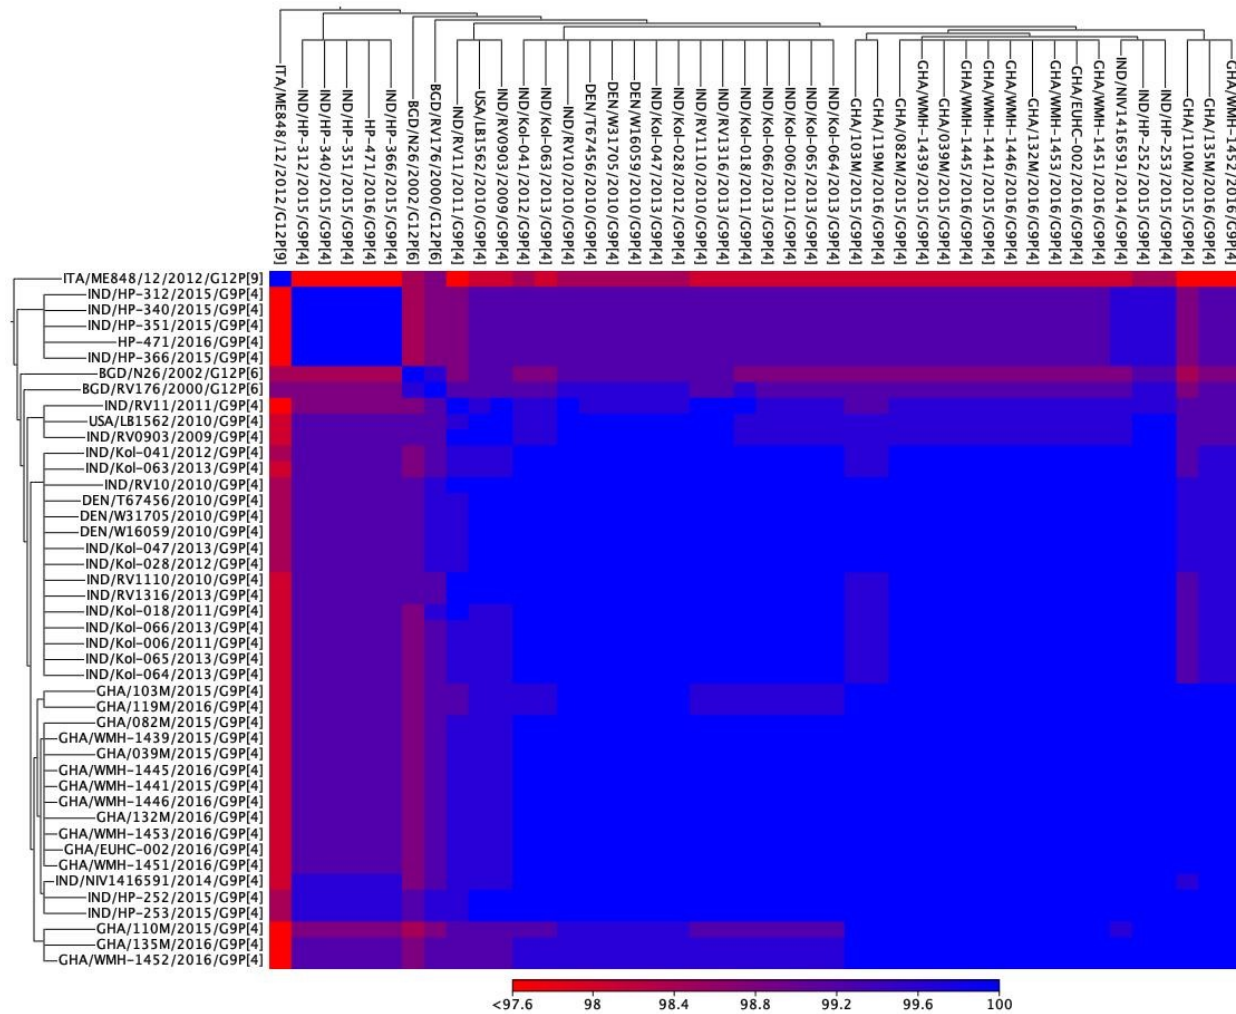

Supplement: s1 [file s1]
