# Supplementary material for: Emergence of Intergenogroup Reassortant G9P[4] Strains Following Rotavirus Vaccine Introduction in Ghana
Source: MDPI journal article supplement (doi:10.3390/v15122453), 2023-12-18
Supplement: s1 [file s1]

Table S1.The genotype constellations of Ghanaian G9P[4] and G2P[4] strains, as well as those of additional G9P[4] strains for which all 11 genome segments are available in the DNA database.

|                |                         |               |     |                                 |                      |                                                                                                 |                            | Major<br>genogroups | VP7         |      |     | VP4  | VP6 | VP1  | VP2  | VP3  | NSP1 | NSP2 | NSP3 | NSP4 | NSP5 |
|----------------|-------------------------|---------------|-----|---------------------------------|----------------------|-------------------------------------------------------------------------------------------------|----------------------------|---------------------|-------------|------|-----|------|-----|------|------|------|------|------|------|------|------|
|                |                         |               |     |                                 |                      |                                                                                                 |                            | Wa                  | G1/G3/G4/G9 |      |     | P[8] | I1  | R1   | C1   | M1   | A1   | N1   | T1   | E1   | H1   |
|                |                         |               |     |                                 |                      |                                                                                                 |                            | DS-1                | G2/G8       |      |     | P[4] | I2  | R2   | C2   | M2   | A2   | N2   | T2   | E2   | H2   |
|                |                         |               |     |                                 |                      |                                                                                                 |                            | AU-1                | G3          |      |     | P[9] | I3  | R3   | C3   | M3   | A3   | N3   | T3   | E3   | H3   |
|                |                         |               |     |                                 |                      |                                                                                                 |                            |                     |             |      |     |      |     |      |      |      |      |      |      |      |      |
| Name of strain | Country of<br>isolation | Age in months | SEX | History of rotavirus<br>vaccine | Year of<br>isolation | The number (%)<br>of segments<br>exhibits similar<br>genotypes to<br>Ghanaian G9P[4]<br>strains | Frequency of<br>appearance | VP7                 | VP4         | VP6  | VP1 | VP2  | VP3 | NSP1 | NSP2 | NSP3 | NSP4 | NSP5 |      |      |      |
| 1              | WMH-1444                | Ghana         | 13  | F                               | Yes (Rotarix-2doses) | 2016                                                                                            | 9 ( 81% )                  | Predominant         | G2          | P[4] | I2  | R2   | C2  | M2   | A2   | N2   | T2   | E2   | H2   |      |      |
| 2              | WMH-1447                | Ghana         | 20  | M                               | Yes (Rotarix-2doses) | 2016                                                                                            | 9 ( 81% )                  | Predominant         | G2          | P[4] | I2  | R2   | C2  | M2   | A2   | N2   | T2   | E2   | H2   |      |      |
| 3              | 039M                    | Ghana         | 10  | F                               | Yes (Rotarix-2doses) | 2015                                                                                            | 11 (100% )                 | Predominant         | G9          | P[4] | I2  | R2   | C2  | M2   | A2   | N2   | T2   | E6   | H2   |      |      |
| 4              | 082M                    | Ghana         | 14  | M                               | Yes (Rotarix-2doses) | 2015                                                                                            | 11 (100% )                 | Predominant         | G9          | P[4] | I2  | R2   | C2  | M2   | A2   | N2   | T2   | E6   | H2   |      |      |
| 5              | 103M                    | Ghana         | 17  | F                               | Yes (Rotarix-2doses) | 2015                                                                                            | 11 (100% )                 | Predominant         | G9          | P[4] | I2  | R2   | C2  | M2   | A2   | N2   | T2   | E6   | H2   |      |      |
| 6              | 110M                    | Ghana         | 15  | M                               | Yes (Rotarix-2doses) | 2015                                                                                            | 11 (100% )                 | Predominant         | G9          | P[4] | I2  | R2   | C2  | M2   | A2   | N2   | T2   | E6   | H2   |      |      |
| 7              | 119M                    | Ghana         | 12  | M                               | Yes (Rotarix-2doses) | 2016                                                                                            | 11 (100% )                 | Predominant         | G9          | P[4] | I2  | R2   | C2  | M2   | A2   | N2   | T2   | E6   | H2   |      |      |
| 8              | 132M                    | Ghana         | 22  | F                               | No                   | 2016                                                                                            | 11 (100% )                 | Predominant         | G9          | P[4] | I2  | R2   | C2  | M2   | A2   | N2   | T2   | E6   | H2   |      |      |
| 9              | 135M                    | Ghana         | 20  | F                               | Yes (Rotarix-2doses) | 2016                                                                                            | 11 (100% )                 | Predominant         | G9          | P[4] | I2  | R2   | C2  | M2   | A2   | N2   | T2   | E6   | H2   |      |      |
| 10             | WMH-1439                | Ghana         | 30  | unknow                          | Yes (Rotarix-2doses) | 2015                                                                                            | 11 (100% )                 | Predominant         | G9          | P[4] | I2  | R2   | C2  | M2   | A2   | N2   | T2   | E6   | H2   |      |      |
| 11             | WMH-1441                | Ghana         | 25  | M                               | Yes (Rotarix-2doses) | 2015                                                                                            | 11 (100% )                 | Predominant         | G9          | P[4] | I2  | R2   | C2  | M2   | A2   | N2   | T2   | E6   | H2   |      |      |
| 12             | WMH-1445                | Ghana         | 12  | M                               | Yes (Rotarix-2doses) | 2016                                                                                            | 11 (100% )                 | Predominant         | G9          | P[4] | I2  | R2   | C2  | M2   | A2   | N2   | T2   | E6   | H2   |      |      |
| 13             | WMH-1446                | Ghana         | 30  | M                               | Yes (Rotarix-2doses) | 2016                                                                                            | 11 (100% )                 | Predominant         | G9          | P[4] | I2  | R2   | C2  | M2   | A2   | N2   | T2   | E6   | H2   |      |      |
| 14             | WMH-1451                | Ghana         | 20  | F                               | Yes (Rotarix-2doses) | 2016                                                                                            | 11 (100% )                 | Predominant         | G9          | P[4] | I2  | R2   | C2  | M2   | A2   | N2   | T2   | E6   | H2   |      |      |
| 15             | WMH-1452                | Ghana         | 23  | F                               | Yes (Rotarix-2doses) | 2016                                                                                            | 11 (100% )                 | Predominant         | G9          | P[4] | I2  | R2   | C2  | M2   | A2   | N2   | T2   | E6   | H2   |      |      |
| 16             | WMH-1453                | Ghana         | 7   | F                               | Yes (Rotarix-2doses) | 2016                                                                                            | 11 (100% )                 | Predominant         | G9          | P[4] | I2  | R2   | C2  | M2   | A2   | N2   | T2   | E6   | H2   |      |      |
| 17             | EUHC-002                | Ghana         | 16  | M                               | unknown              | 2016                                                                                            | 11 (100% )                 | Predominant         | G9          | P[4] | I2  | R2   | C2  | M2   | A2   | N2   | T2   | E6   | H2   |      |      |
| 19             | 1157A                   | Paraguay      |     |                                 |                      | 2007                                                                                            | 10 (90% )                  | Sporadic            | G9          | P[4] | I2  | R2   | C2  | M2   | A2   | N2   | T2   | E3   | H2   |      |      |
| 20             | Bang-068                | Bangladesh    |     |                                 |                      | 2008                                                                                            | 10 (90% )                  | Sporadic            | G9          | P[4] | I2  | R2   | C2  | M2   | A2   | N2   | T2   | E2   | H2   |      |      |

|    |             |                |      |            |             |    |      |    |    |    |    |    |    |    |    |    |
|----|-------------|----------------|------|------------|-------------|----|------|----|----|----|----|----|----|----|----|----|
| 21 | Seoul1622   | South Korea    | 2011 | 4 (36 %)   | Sporadic    | G9 | P[4] | I2 | R2 | C1 | M1 | A1 | N1 | T1 | E1 | H1 |
| 22 | RV09        | Pune, India    | 2009 | 9 ( 81% )  | Predominant | G9 | P[4] | I2 | R2 | C2 | M2 | A2 | N2 | T1 | E2 | H2 |
| 18 | LB1562      | USA            | 2010 | 11 (100% ) | Sporadic    | G9 | P[4] | I2 | R2 | C2 | M2 | A2 | N2 | T2 | E6 | H2 |
| 23 | RV10        | Pune, India    | 2010 | 11 (100% ) | Predominant | G9 | P[4] | I2 | R2 | C2 | M2 | A2 | N2 | T2 | E6 | H2 |
| 24 | RV11        | Pune, India    | 2011 | 11 (100% ) | Predominant | G9 | P[4] | I2 | R2 | C2 | M2 | A2 | N2 | T2 | E6 | H2 |
| 25 | Kol-006     | Kolkata, India | 2011 | 10 (90% )  | Predominant | G9 | P[4] | I2 | R2 | C2 | M2 | A2 | N1 | T2 | E6 | H2 |
| 26 | Kol-018     | Kolkata, India | 2011 | 10 (90% )  | Predominant | G9 | P[4] | I2 | R2 | C2 | M2 | A2 | N1 | T2 | E6 | H2 |
| 27 | Kol-028     | Kolkata, India | 2012 | 11 (100% ) | Predominant | G9 | P[4] | I2 | R2 | C2 | M2 | A2 | N2 | T2 | E6 | H2 |
| 28 | Kol-040     | Kolkata, India | 2012 | 11 (100% ) | Predominant | G9 | P[4] | I2 | R2 | C2 | M2 | A2 | N2 | T2 | E6 | H2 |
| 29 | Kol-041     | Kolkata, India | 2012 | 11 (100% ) | Predominant | G9 | P[4] | I2 | R2 | C2 | M2 | A2 | N2 | T2 | E6 | H2 |
| 30 | Kol-063     | Kolkata, India | 2012 | 11 (100% ) | Predominant | G9 | P[4] | I2 | R2 | C2 | M2 | A2 | N2 | T2 | E6 | H2 |
| 31 | S120088     | Japan          | 2012 | 10 (90% )  | Sporadic    | G9 | P[4] | I2 | R2 | C2 | M2 | A2 | N2 | T1 | E2 | H2 |
| 32 | 11584       | Japan          | 2013 | 10 (90% )  | Sporadic    | G9 | P[4] | I2 | R2 | C2 | M2 | A2 | N2 | T2 | E2 | H2 |
| 33 | MRC-DPRU566 | Rwanda         | 2013 | 7 ( 63% )  | Sporadic    | G9 | P[4] | I2 | R2 | C2 | M2 | A1 | N1 | T1 | E1 | H1 |
| 34 | Kol-047     | Kolkata, India | 2013 | 10 (90% )  | Predominant | G9 | P[4] | I2 | R2 | C2 | M2 | A2 | N1 | T2 | E6 | H2 |
| 35 | Kol-051     | Kolkata, India | 2013 | 10 (90% )  | Predominant | G9 | P[4] | I2 | R2 | C2 | M2 | A2 | N1 | T2 | E6 | H2 |
| 36 | Kol-064     | Kolkata, India | 2013 | 10 (90% )  | Predominant | G9 | P[4] | I2 | R2 | C2 | M2 | A2 | N1 | T2 | E6 | H2 |
| 37 | Kol-065     | Kolkata, India | 2013 | 10 (90% )  | Predominant | G9 | P[4] | I2 | R2 | C2 | M2 | A2 | N1 | T2 | E6 | H2 |
| 38 | Kol-066     | Kolkata, India | 2013 | 10 (90% )  | Predominant | G9 | P[4] | I2 | R2 | C2 | M2 | A2 | N1 | T2 | E6 | H2 |
| 39 | AN18        | Italy          | 2016 | 10 (90% )  | Sporadic    | G9 | P[4] | I2 | R2 | C2 | M2 | A2 | N2 | T2 | E2 | H2 |
| 40 | AN19        | Italy          | 2016 | 10 (90% )  | Sporadic    | G9 | P[4] | I2 | R2 | C2 | M2 | A2 | N2 | T2 | E2 | H2 |
| 41 | AN22        | Italy          | 2016 | 10 (90% )  | Sporadic    | G9 | P[4] | I2 | R2 | C2 | M2 | A2 | N2 | T2 | E2 | H2 |
| 42 | H186        | Czech Republic | 2018 | 9 ( 81% )  | Sporadic    | G9 | P[4] | I2 | R2 | C2 | M2 | A2 | N1 | T2 | E2 | H2 |
| 43 | H187        | Czech Republic | 2018 | 9 ( 81% )  | Sporadic    | G9 | P[4] | I2 | R2 | C2 | M2 | A2 | N1 | T2 | E2 | H2 |

*The strains identified in this study are highlighted in red*
