# Supplementary material for: Emergence of Intergenogroup Reassortant G9P[4] Strains Following Rotavirus Vaccine Introduction in Ghana
Source: Viruses. 2023 Dec 18;15(12):2453. doi: 10.3390/v15122453 (PMC10747750; doi:10.3390/v15122453)
Supplement: Supplementary file 1 [file viruses-15-02453-s001.zip]

Archive with 5 entries (5 files):
- 01_Table S1_231218.pdf
- 02_Figure S1_231218.pdf
- 03_Figure S2 231218.pdf
- 04_Figure S3_231218.pdf
- 05_Table S2-231218.pdf
